# Supplementary material for: Tetrathiafulvalene-based double metal lead iodides: structures and electrical properties
Source: Royal Society of Chemistry journal article supplement (doi:10.1039/d1dt00631b), 2021-01-01
Supplement: d1dt00631b1.pdf [file d1dt00631b1.pdf]

## Supporting Information for

### Tetrathiafulvalene-based double metal lead iodides, structures and electrical properties

Wen-Yu Yin,<sup>a,b</sup> Yi-Gang Weng,<sup>a</sup> Zhou-Hong Ren,<sup>a</sup> Zhi-Ruo Zhang,<sup>a</sup> Qin-Yu Zhu,<sup>\*a</sup>  
and Jie Dai<sup>\*a</sup>

<sup>a</sup> College of Chemistry, Chemical Engineering and Materials Science, Soochow University, Suzhou 215123, People's Republic of China

<sup>b</sup> Key Laboratory of Advanced Functional Materials; School of Chemistry & Materials Engineering, Changshu Institute of Technology, Changshu, 215500, People's Republic of China

#### Figures

Fig. S1. EDX of compounds **1–4**, showing no existence of Cl element and verifying the Pb/Cu ratios of **1** (1:1) and **2** (1:2).

Fig. S2. The experimental powder XRD pattern and the simulated pattern from the crystal data of compounds **1–4**.

Fig. S3. Water molecule connects two neutral TTF with two anions through hydrogen bonds to be a 1D structure in **1**.

Fig. S4. Molecular structures of compounds **3** and **4**, showing the similarity in anion structure and different in co-crystallized water molecule.

Fig. S5. Assembly of the cation columns and anion chains in compounds **3** and **4**.

Fig. S6. Cyclic voltammograms of **1–4**, showing the multiple cycles (in solid state, at a scan rate of 100 mV s<sup>-1</sup>, vs SCE, CH<sub>3</sub>CN, Bt<sub>4</sub>NCIO<sub>4</sub>).

Fig. S7. Mott–Schottky plots of **1** measured in Na<sub>2</sub>SO<sub>4</sub> solution.

#### Tables

Table S1. Crystal data and structural refinement parameters for compounds **1–4**.

Table S2. Short C···C, S···S, C···S and S···I interaction in compounds **1–4**.

## Figures

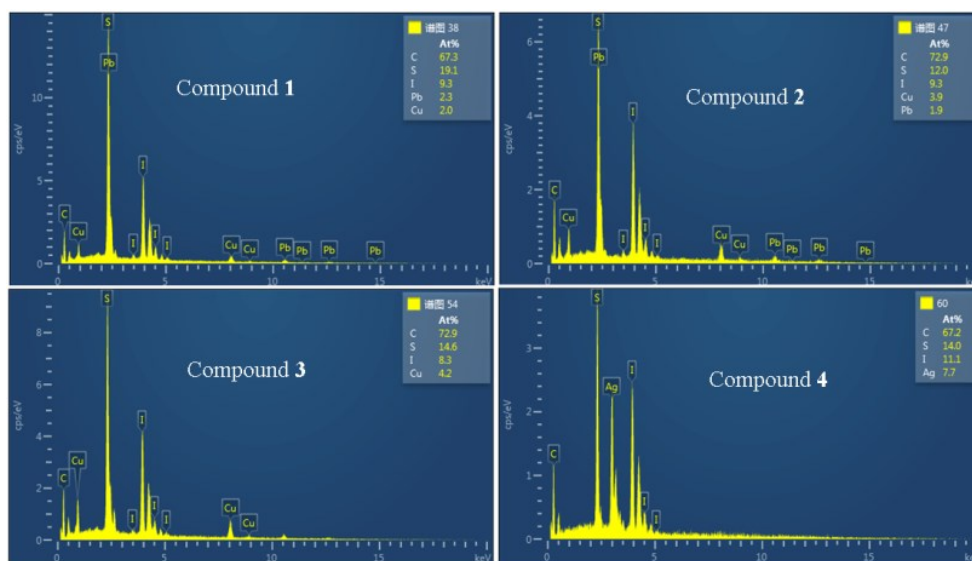

Fig. S1. EDX of compounds 1–4, showing no existence of Cl element and verifying the Pb/Cu ratios of 1 (1:1) and 2 (1:2).

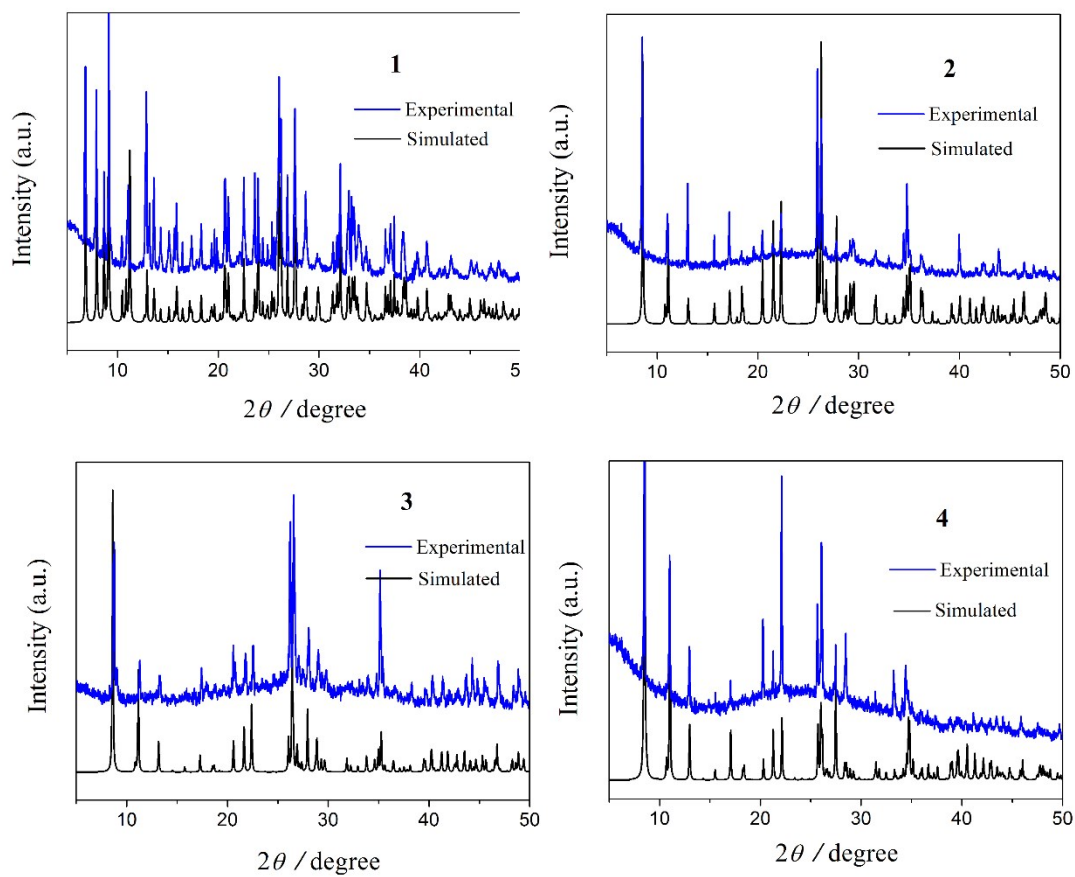

Fig. S2. The experimental powder XRD pattern and the simulated pattern from the crystal data of compounds **1–4**.

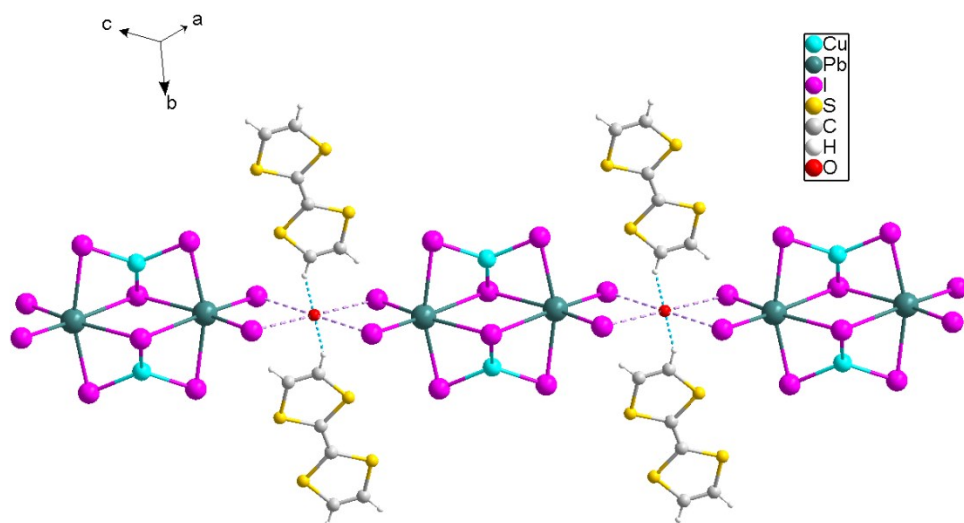

Fig. S3. Water molecule connects two neutral TTF with two anions through hydrogen bonds to be a 1D structure in **1**.

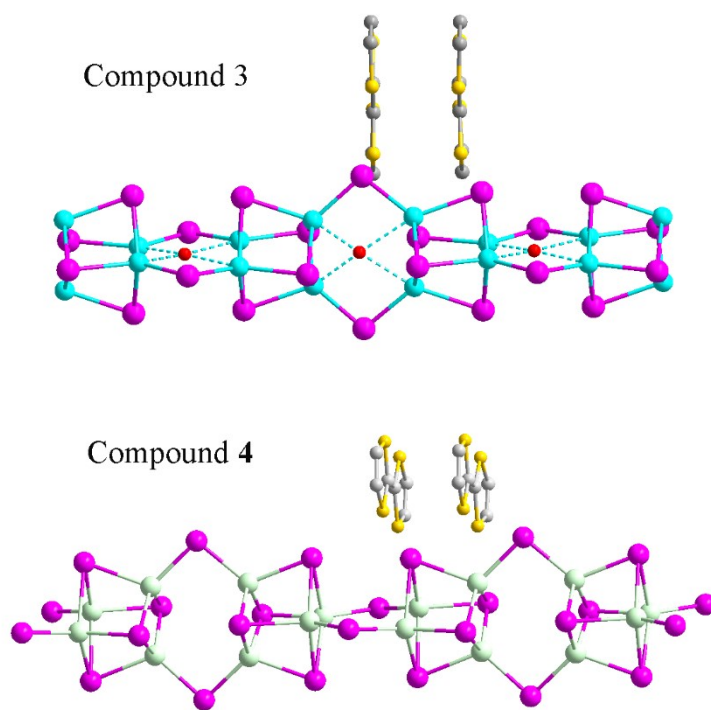

Fig. S4. Molecular structures of compounds **3** and **4**, showing the similarity in anion structure and different in co-crystallized water molecule.

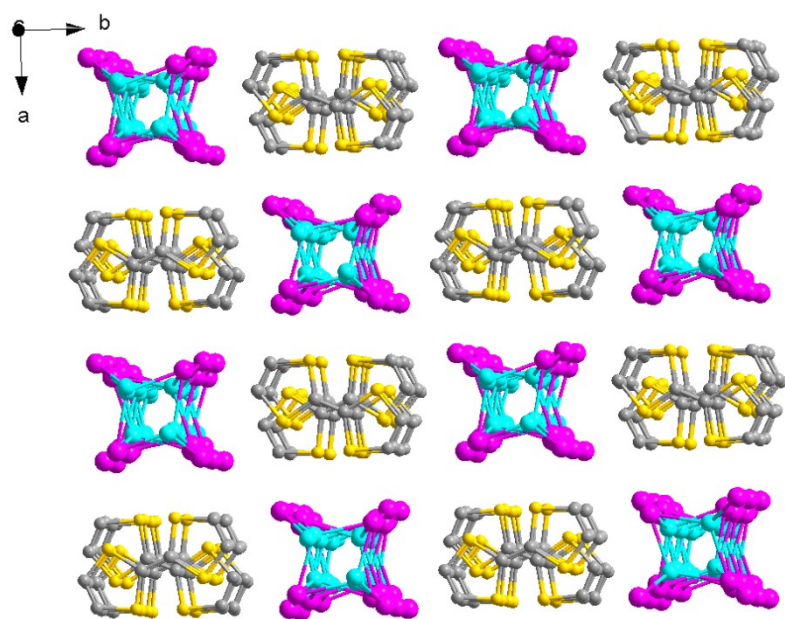

Fig. S5. Assembly of the cation columns and anion chains in compound **3** and **4**.

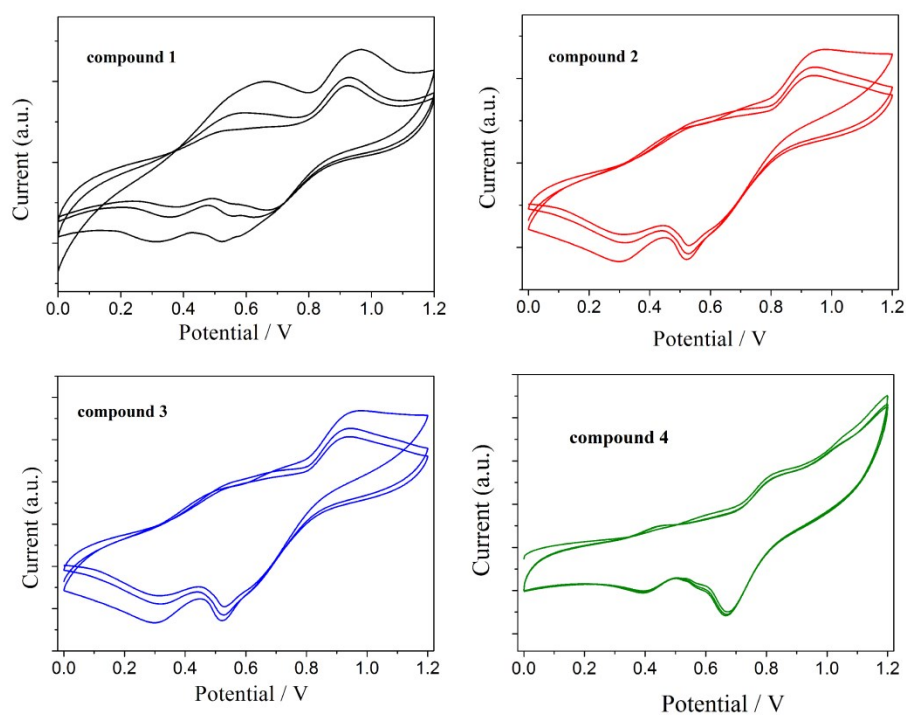

Fig. S6. Cyclic voltammograms of **1–4**, showing the multiple cycles (in solid state, at a scan rate of  $100 \text{ mV s}^{-1}$ , vs SCE,  $\text{CH}_3\text{CN}$ ,  $\text{Bt}_4\text{NClO}_4$ ).

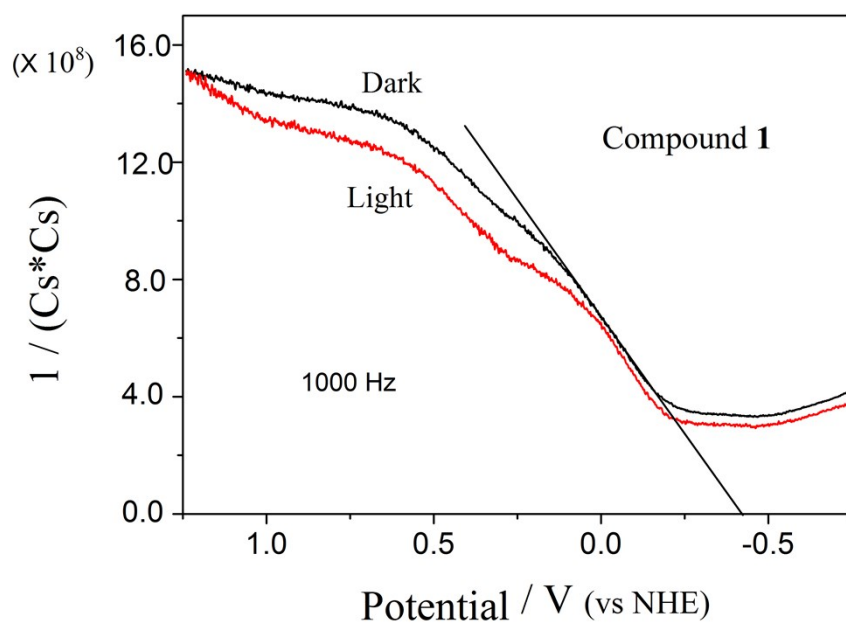

Fig. S7. Mott–Schottky plots of **1** measured in  $\text{Na}_2\text{SO}_4$  solution.

Table S1. Crystal data and structural refinement parameters for compounds **1–4**.

|                                                             | <b>1</b>                                                                                         | <b>2</b>                                                                       | <b>3</b>                                                                       | <b>4</b>                                                                     |
|-------------------------------------------------------------|--------------------------------------------------------------------------------------------------|--------------------------------------------------------------------------------|--------------------------------------------------------------------------------|------------------------------------------------------------------------------|
| formula                                                     | C <sub>30</sub> H <sub>22</sub> Cu <sub>2</sub> I <sub>10</sub> OPb <sub>2</sub> S <sub>20</sub> | C <sub>12</sub> H <sub>8</sub> Cu <sub>2</sub> I <sub>6</sub> PbS <sub>8</sub> | C <sub>12</sub> H <sub>10</sub> Cu <sub>4</sub> I <sub>6</sub> OS <sub>8</sub> | C <sub>12</sub> H <sub>8</sub> Ag <sub>4</sub> I <sub>6</sub> S <sub>8</sub> |
| Fw                                                          | 2850.13                                                                                          | 1504.33                                                                        | 1442.35                                                                        | 1601.62                                                                      |
| cryst size (mm <sup>3</sup> )                               | 0.2×0.08×0.08                                                                                    | 0.2×0.2×0.1                                                                    | 0.3×0.2×0.1                                                                    | 0.4×0.2×0.1                                                                  |
| cryst syst                                                  | triclinic                                                                                        | orthorhombic                                                                   | orthorhombic                                                                   | orthorhombic                                                                 |
| space group                                                 | <i>P</i> $\bar{1}$                                                                               | <i>Cccm</i>                                                                    | <i>Pccn</i>                                                                    | <i>Pccn</i>                                                                  |
| <i>a</i> (Å)                                                | 10.9196(19)                                                                                      | 15.931(4)                                                                      | 13.4453(16)                                                                    | 16.135(3)                                                                    |
| <i>b</i> (Å)                                                | 11.281(2)                                                                                        | 13.531(3)                                                                      | 15.8728(19)                                                                    | 13.700(2)                                                                    |
| <i>c</i> (Å)                                                | 13.700(2)                                                                                        | 13.491(3)                                                                      | 13.4449(16)                                                                    | 13.745(3)                                                                    |
| $\alpha$ (deg)                                              | 86.986(4)                                                                                        | 90                                                                             | 90                                                                             | 90                                                                           |
| $\beta$ (deg)                                               | 70.722(4)                                                                                        | 90                                                                             | 90                                                                             | 90                                                                           |
| $\gamma$ (deg)                                              | 80.970(4)                                                                                        | 90                                                                             | 90                                                                             | 90                                                                           |
| <i>V</i> (Å <sup>3</sup> )                                  | 1573.3(5)                                                                                        | 2908.2(12)                                                                     | 2869.3(6)                                                                      | 3038.3(10)                                                                   |
| <i>Z</i>                                                    | 1                                                                                                | 4                                                                              | 4                                                                              | 2                                                                            |
| $\rho_{\text{calcd}}$ (g cm <sup>-3</sup> )                 | 3.006                                                                                            | 3.436                                                                          | 3.334                                                                          | 3.501                                                                        |
| <i>F</i> (000)                                              | 1282                                                                                             | 2664                                                                           | 2600                                                                           | 2856                                                                         |
| $\mu$ (mm <sup>-1</sup> )                                   | 11.60                                                                                            | 14.172                                                                         | 9.972                                                                          | 9.192                                                                        |
| <i>T</i> (K)                                                | 213(2)                                                                                           | 213(2)                                                                         | 213(2)                                                                         | 213(2)                                                                       |
| reflns collected                                            | 24275                                                                                            | 6952                                                                           | 23502                                                                          | 26196                                                                        |
| unique reflns                                               | 7015                                                                                             | 1745                                                                           | 3196                                                                           | 3464                                                                         |
| observed reflns                                             | 5679                                                                                             | 1272                                                                           | 2564                                                                           | 2301                                                                         |
| no. params                                                  | 290                                                                                              | 72                                                                             | 141                                                                            | 136                                                                          |
| GOF on <i>F</i> <sup>2</sup>                                | 1.031                                                                                            | 1.027                                                                          | 1.019                                                                          | 1.007                                                                        |
| <i>R</i> <sub>1</sub> [ <i>I</i> >2 $\sigma$ ( <i>I</i> )]  | 0.0466                                                                                           | 0.0479                                                                         | 0.0353                                                                         | 0.0408                                                                       |
| <i>wR</i> <sub>2</sub> [ <i>I</i> >2 $\sigma$ ( <i>I</i> )] | 0.1222                                                                                           | 0.1237                                                                         | 0.0901                                                                         | 0.0906                                                                       |



Table S2. Short C⋯C, S⋯S, C⋯S and S⋯I interaction in compounds 1–4.

| C⋯C distance (Å) |        |           |        |            |         |           |
|------------------|--------|-----------|--------|------------|---------|-----------|
| 1                | C3⋯C9  | 3.404(13) | C4⋯C6  | 3.385(13)  | C10⋯C10 | 3.639(13) |
| 2                | C3⋯C3  | 3.303(12) | C3⋯C3  | 3.495 (12) |         |           |
| 3                | C3⋯C6  | 3.324(8)  |        |            |         |           |
| 4                | C3⋯C6  | 3.402(8)  |        |            |         |           |
| S⋯S distance (Å) |        |           |        |            |         |           |
| 1                | S2⋯S6  | 3.435(3)  | S3⋯S7  | 3.399(3)   | S4⋯S8   | 3.420(3)  |
|                  | S4⋯S9  | 3.527(5)  |        |            |         |           |
| 2                | S1⋯S1  | 3.319(3)  | S2⋯S2  | 3.374(4)   | S1⋯S1   | 3.650(3)  |
| 3                | S1⋯S3  | 3.326(3)  | S2⋯S4  | 3.356(2)   | S1⋯S3   | 3.643(2)  |
| 4                | S1⋯S3  | 3.376(3)  | S2⋯S4  | 3.396(4)   |         |           |
| S⋯C distance (Å) |        |           |        |            |         |           |
| 1                | S2⋯C14 | 3.494(18) | S4⋯C15 | 3.278(11)  | S4⋯C15  | 3.144(11) |
| 2                | -      |           |        |            |         |           |
| 3                | S3⋯C1  | 3.494(7)  |        |            |         |           |
| 4                | -      |           |        |            |         |           |
| S⋯I distance (Å) |        |           |        |            |         |           |
| 1                | S3⋯I1  | 3.767(4)  | S6⋯I5  | 3.551(4)   | S7⋯I3   | 3.633(3)  |
|                  | S9⋯I2  | 3.768(3)  | S10⋯I1 | 3.681(3)   |         |           |
| 2                | S2⋯I2  | 3.710(3)  |        |            |         |           |
| 3                | S2⋯I1  | 3.695(2)  | S4⋯I1  | 3.703(2)   |         |           |
| 4                | S2⋯I1  | 3.772(3)  |        |            |         |           |
